# Supplementary material for: Understanding the activity of single atom catalysts for CO2 reduction to C2 products: A high throughput computational screening
Source: Royal Society of Chemistry journal article supplement (doi:10.1039/d3nj00247k), 2023-01-01
Supplement: d3nj00247k1.pdf [file d3nj00247k1.pdf]

## Supporting Information File

### Understanding the activity of single atom catalysts for CO<sub>2</sub> reduction to C<sub>2</sub> products: A high throughput computational screening

Afshana Hassan<sup>a</sup> and Manzoor Ahmad Dar<sup>a\*</sup>

<sup>a</sup>Department of Chemistry, Islamic University of Science and Technology, Kashmir  
192122, India

Corresponding author: manzoor.dar@islamicuniversity.edu.in

#### Table of contents

|                                                                                                                                                                                                                                                                                                                                                                                                                                                                                              |      |
|----------------------------------------------------------------------------------------------------------------------------------------------------------------------------------------------------------------------------------------------------------------------------------------------------------------------------------------------------------------------------------------------------------------------------------------------------------------------------------------------|------|
| 1. Fig. S1. Reaction pathways for CO <sub>2</sub> reduction to C <sub>2</sub> H <sub>4</sub> and C <sub>2</sub> H <sub>5</sub> OH on (a) Mn@C <sub>2</sub> N, (b) Co@C <sub>2</sub> N, (c) Tc@C <sub>2</sub> N, (d) Rh@C <sub>2</sub> N, (e) Pd@C <sub>2</sub> N, (f) Re@C <sub>2</sub> N, (g) Os@C <sub>2</sub> N and (h) Ir@C <sub>2</sub> N catalysts.....                                                                                                                                | 2    |
| 2. Fig. S2. Reaction pathways for CO <sub>2</sub> reduction on (a) Sc@C <sub>2</sub> N, (b) Ti@C <sub>2</sub> N, (c) V@C <sub>2</sub> N, (d) Ni@C <sub>2</sub> N, (e) Y@C <sub>2</sub> N, (f) Zr@C <sub>2</sub> N, (g) Nb@C <sub>2</sub> N, (h) Mo@C <sub>2</sub> N, (i) Ru@C <sub>2</sub> N, (j) Ag@C <sub>2</sub> N, (k) La@C <sub>2</sub> N, (l) Hf@C <sub>2</sub> N, (m) Ta@C <sub>2</sub> N, (n) W@C <sub>2</sub> N, (o) Pt@C <sub>2</sub> N and (p) Au@C <sub>2</sub> N catalysts..... | 3-4  |
| 3. Fig. S3. Energy barrier for hydrogenating *COCHO to *CCO (Cr@C <sub>2</sub> N and Fe@C <sub>2</sub> N) and *COOH to *CO (Cu@C <sub>2</sub> N) .....                                                                                                                                                                                                                                                                                                                                       | 4    |
| 4. Fig. S4. AIMD plots for Cr@C <sub>2</sub> N, Fe@C <sub>2</sub> N and Cu@C <sub>2</sub> N .....                                                                                                                                                                                                                                                                                                                                                                                            | 5    |
| 5. Fig. S5. Adsorption free energies of CO <sub>2</sub> RR intermediates versus ΔG(*COCH <sub>2</sub> O) .....                                                                                                                                                                                                                                                                                                                                                                               | 6    |
| 6. Fig. S6. Predicted free energy change for each reaction step .....                                                                                                                                                                                                                                                                                                                                                                                                                        | 7    |
| 7. Table S1. Adsorption free energies of CO <sub>2</sub> reduction intermediates SACs supported on g-C <sub>2</sub> N monolayer .....                                                                                                                                                                                                                                                                                                                                                        | 8-11 |
| 8. Table S2. The linear correlation $y = a*x + b$ between adsorption free energy of intermediate species and that of *COCH <sub>2</sub> O .....                                                                                                                                                                                                                                                                                                                                              | 12   |
| 9. Table S3. Predicted limiting potential values for Cr, Mn, Fe, Co, Cu, Tc, Rh, Pd, Re, Os and Ir based catalyst .....                                                                                                                                                                                                                                                                                                                                                                      | 13   |

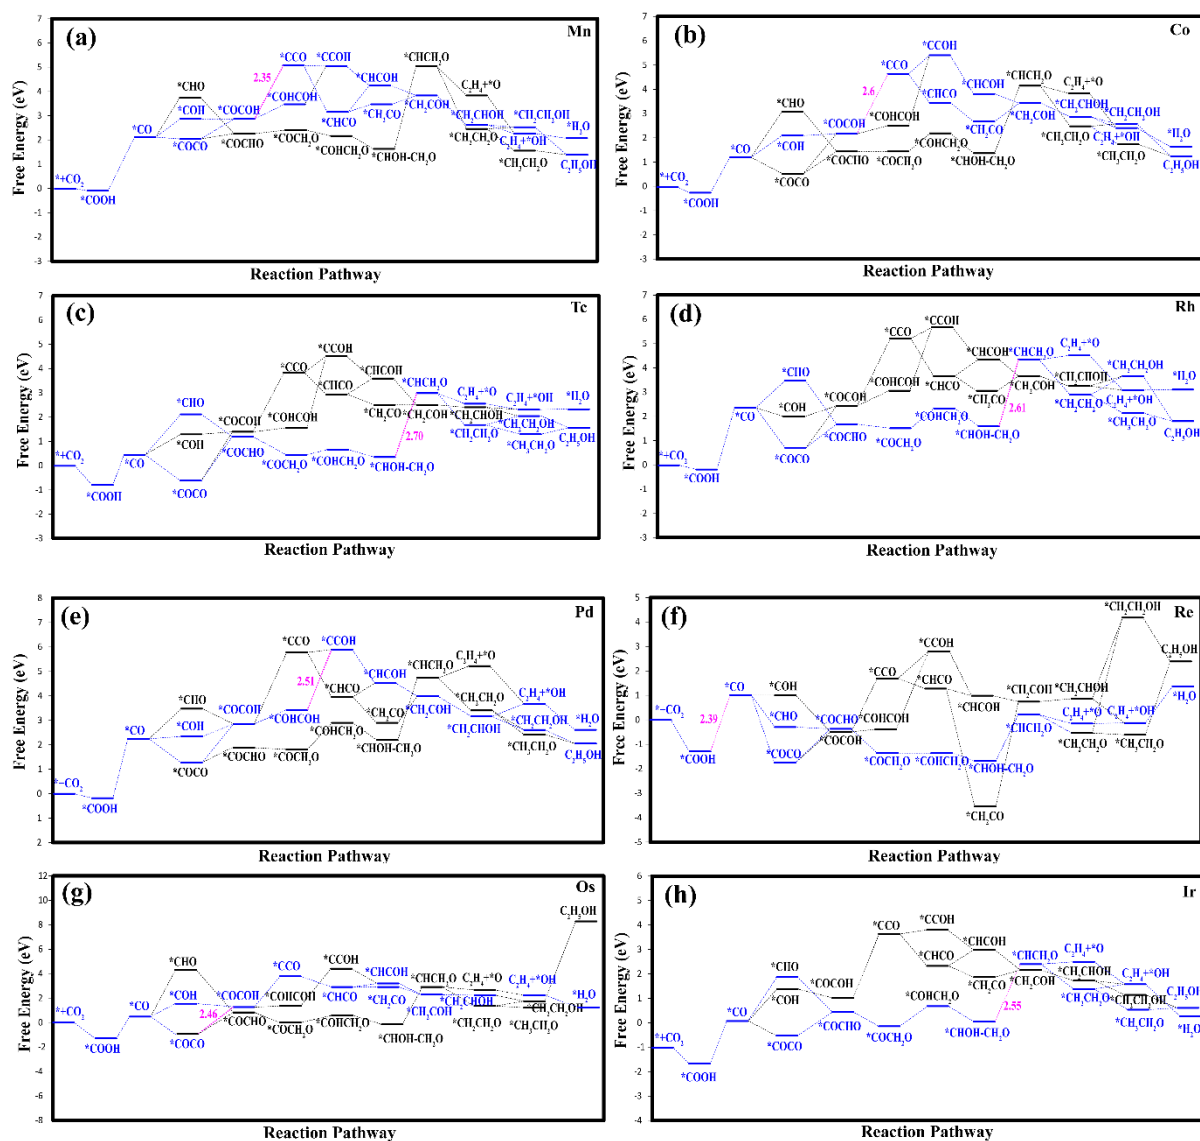

**Fig. S1** The reaction Pathways for CO<sub>2</sub> reduction to C<sub>2</sub>H<sub>4</sub> and C<sub>2</sub>H<sub>5</sub>OH on (a) Mn@C<sub>2</sub>N, (b) Co@C<sub>2</sub>N, (c) Tc@C<sub>2</sub>N, (d) Rh@C<sub>2</sub>N, (e) Pd@C<sub>2</sub>N, (f) Re@C<sub>2</sub>N, (g) Os@C<sub>2</sub>N and (h) Ir@C<sub>2</sub>N catalysts. The most favourable pathways are highlighted in blue colour.

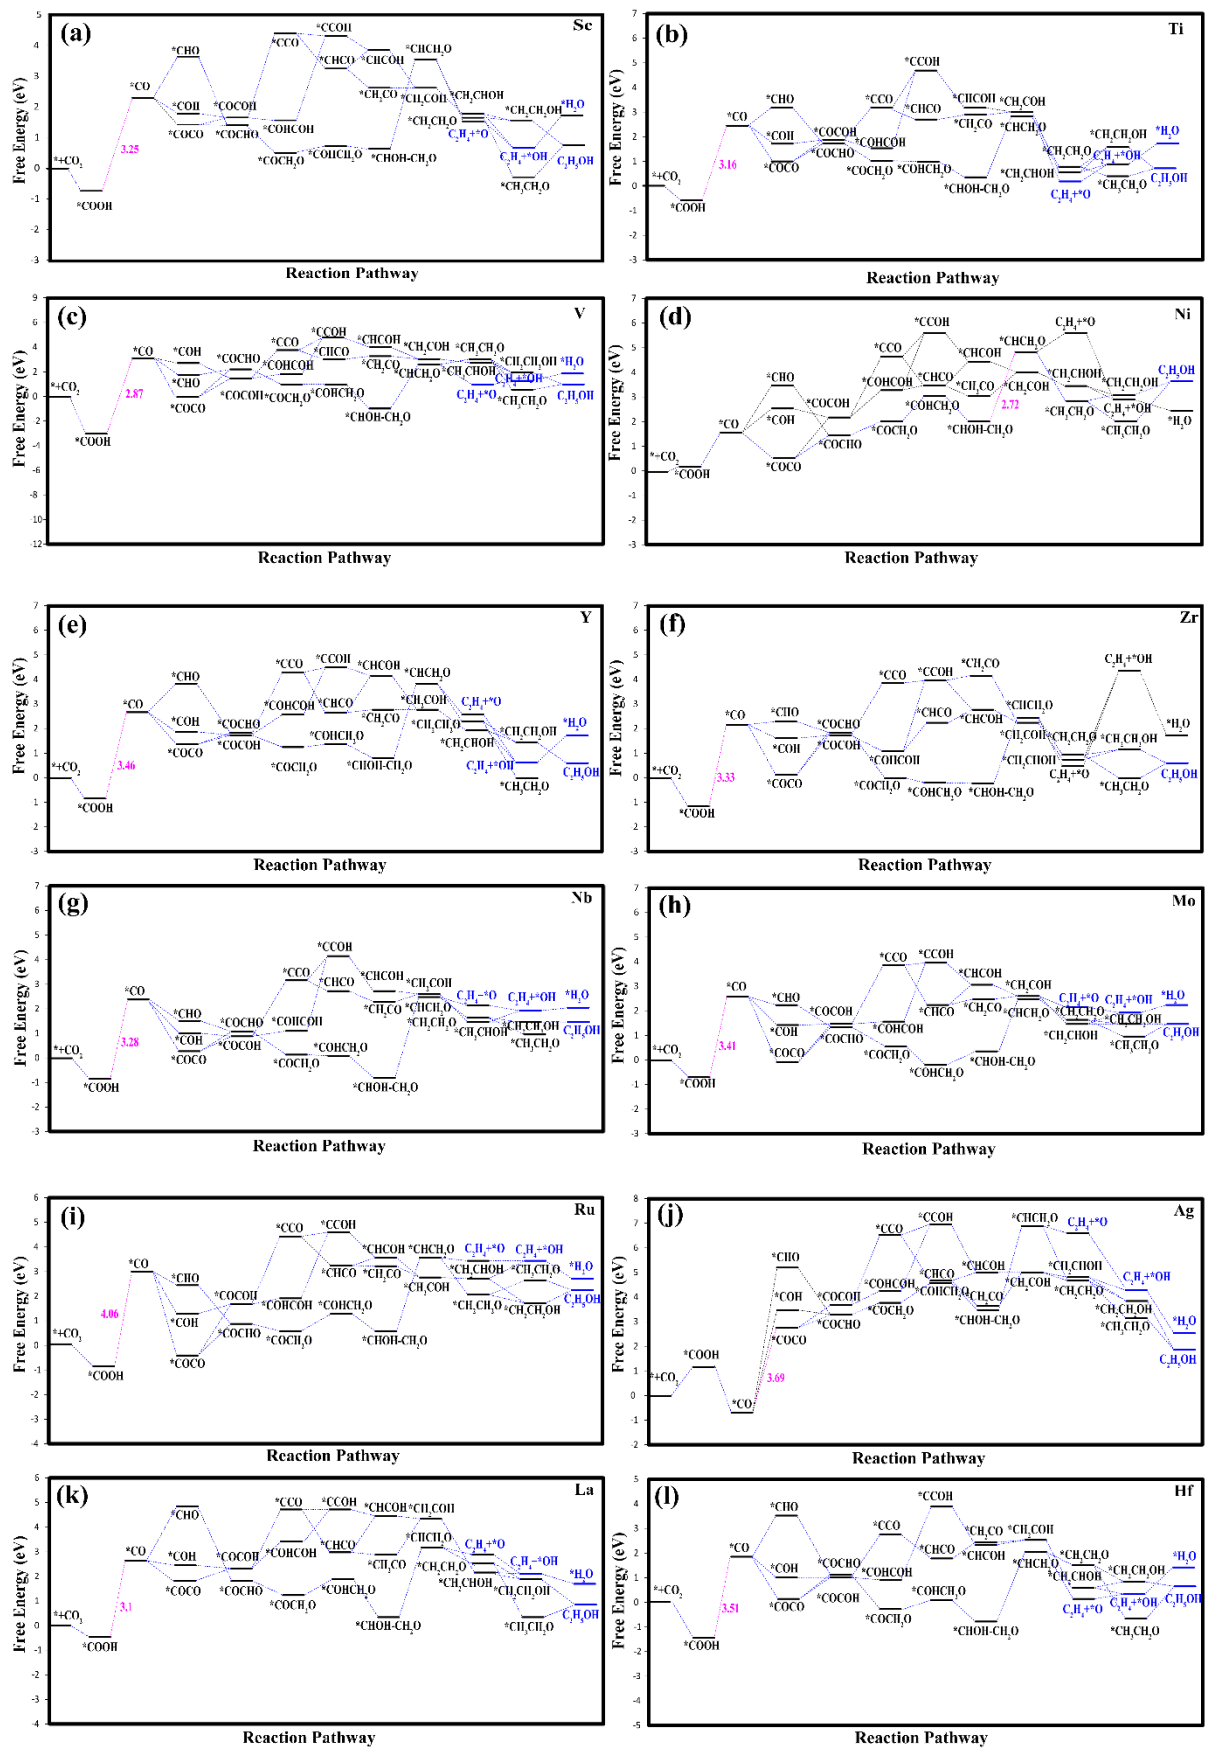

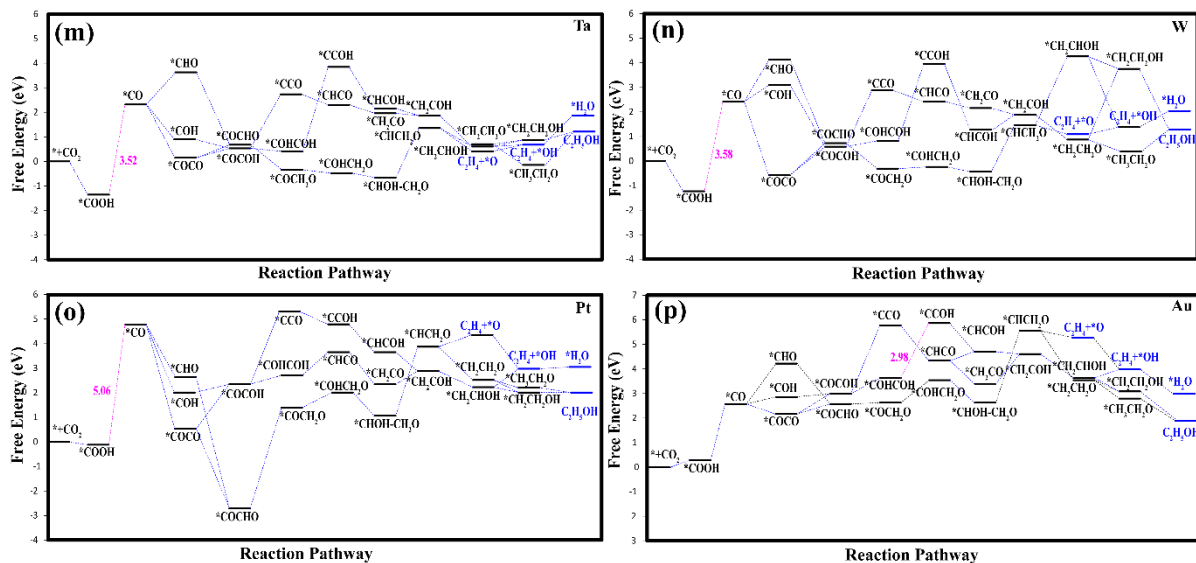

**Fig. S2** The reaction Pathways for  $\text{CO}_2$  reduction to  $\text{C}_2\text{H}_4$  and  $\text{C}_2\text{H}_5\text{OH}$  on (a)  $\text{Sc@C}_2\text{N}$ , (b)  $\text{Ti@C}_2\text{N}$ , (c)  $\text{V@C}_2\text{N}$ , (d)  $\text{Ni@C}_2\text{N}$ , (e)  $\text{Y@C}_2\text{N}$ , (f)  $\text{Zr@C}_2\text{N}$ , (g)  $\text{Nb@C}_2\text{N}$  (h)  $\text{Mo@C}_2\text{N}$ , (i)  $\text{Ru@C}_2\text{N}$ , (j)  $\text{Ag@C}_2\text{N}$ , (k)  $\text{La@C}_2\text{N}$ , (l)  $\text{Hf@C}_2\text{N}$ , (m)  $\text{Ta@C}_2\text{N}$ , (n)  $\text{W@C}_2\text{N}$ , (o)  $\text{Pt@C}_2\text{N}$  and (p)  $\text{Au@C}_2\text{N}$  catalysts.

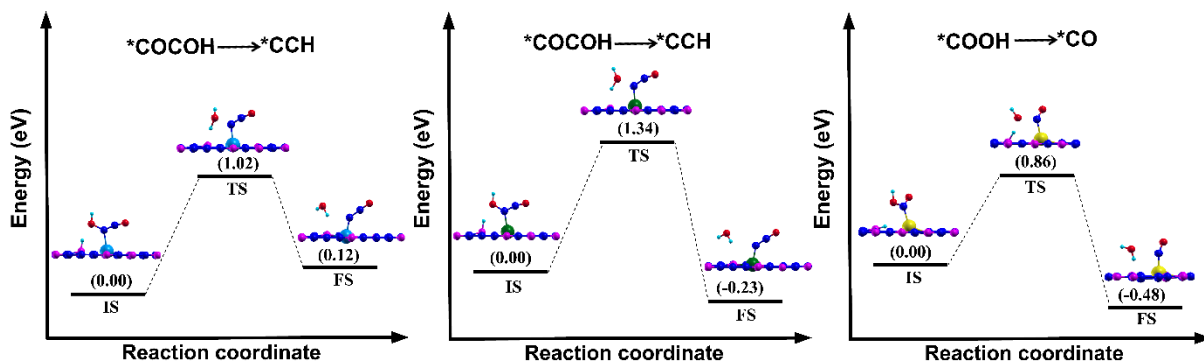

**Fig. S3.** Energy barrier for hydrogenating  $\text{*COCHO}$  to  $\text{*CCO}$  ( $\text{Cr@C}_2\text{N}$  and  $\text{Fe@C}_2\text{N}$ ) and  $\text{*COOH}$  to  $\text{*CO}$  ( $\text{Cu@C}_2\text{N}$ ).

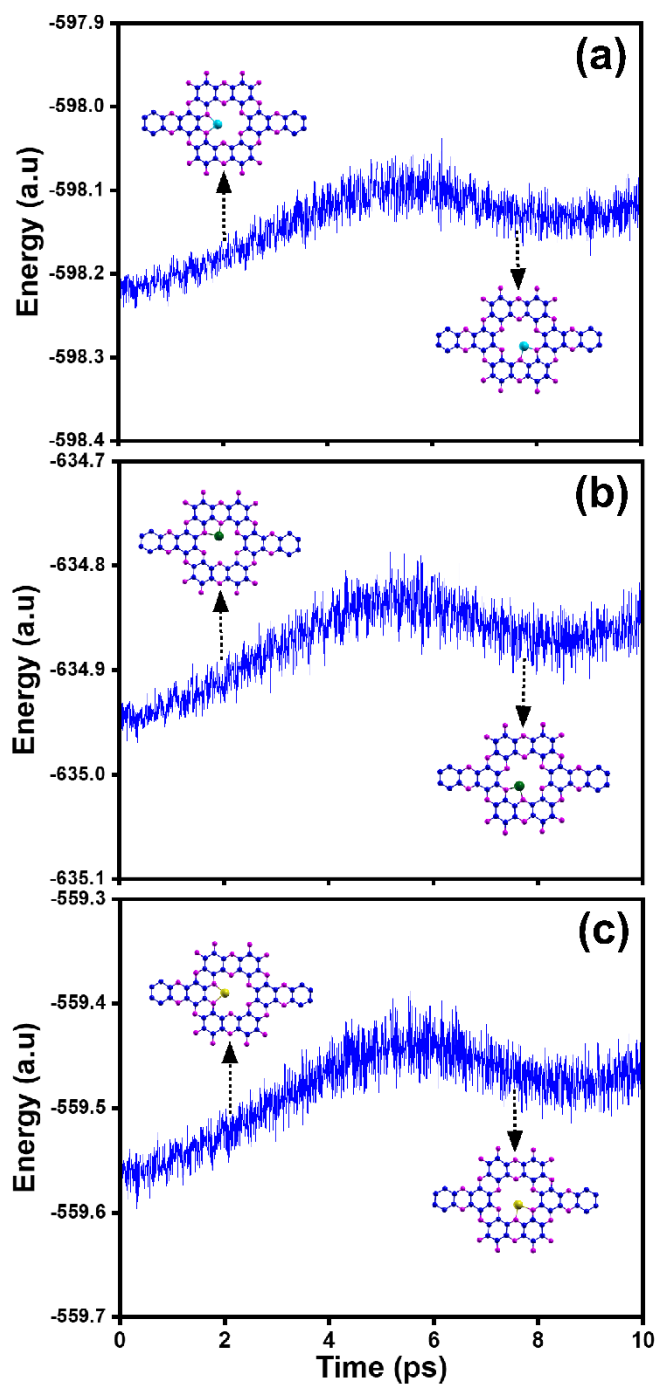

**Fig. S4.** Variation of potential energy with respect to the AIMD simulation time for a period of 10 picoseconds obtained using of NVT ensemble and Nose-Hoover thermostat for (a) Cr@C<sub>2</sub>N, (b) Fe@C<sub>2</sub>N and (c) Cu@C<sub>2</sub>N catalysts at 600 K.

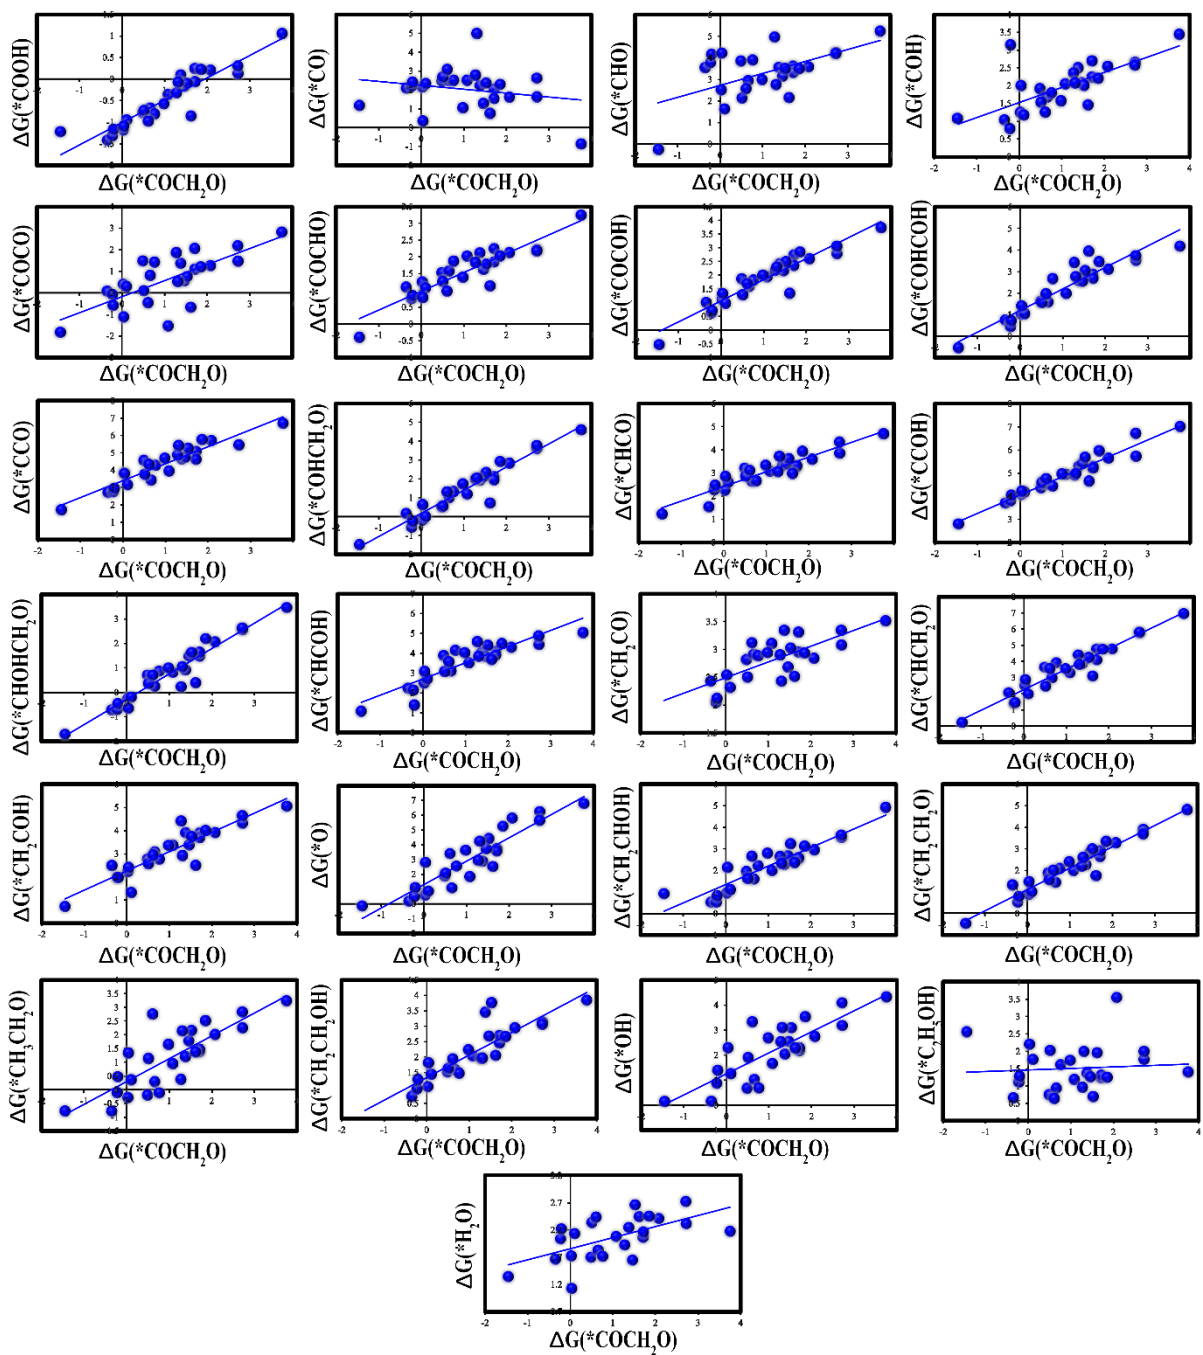

**Fig. S5.** Correlation between adsorption free energies of CO<sub>2</sub>RR intermediates versus ΔG(\*COCH<sub>2</sub>O).

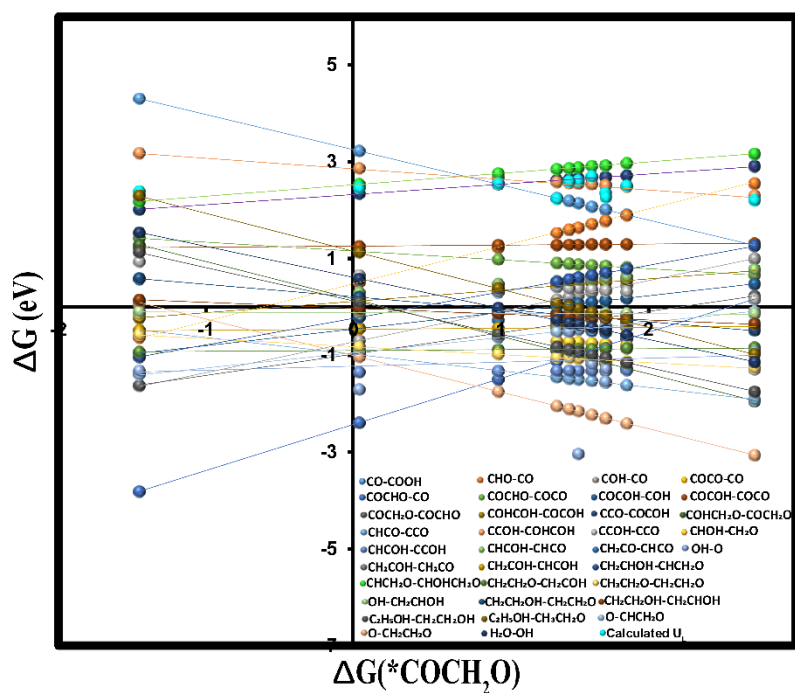

**Fig. S6.** Free energy change for each reaction step, predicted based on linear correlation between adsorption free energy of intermediates and  $\Delta G_{(*\text{COCH}_2\text{O})}$ .

**Table S1.** Adsorption free energies of CO<sub>2</sub> reduction intermediates on SACs supported on g-C<sub>2</sub>N monolayer.

| Catalyst | *COOH | *CO   | *CHO  | *COH | *COCO | *COCHO | *COCOHO |
|----------|-------|-------|-------|------|-------|--------|---------|
| Sc       | -0.78 | 2.47  | 3.86  | 1.91 | 1.48  | 1.52   | 1.87    |
| Ti       | -0.67 | 2.49  | 2.95  | 1.68 | 0.81  | 1.57   | 1.59    |
| V        | -0.36 | 2.51  | 0.01  | 2.05 | -1.54 | 2.02   | 1.95    |
| Cr       | 0.09  | 2.23  | 3.56  | 2.50 | 1.37  | 2.12   | 2.42    |
| Mn       | -0.06 | 2.04  | 3.62  | 2.70 | 2.06  | 2.25   | 2.74    |
| Fe       | 0.25  | 1.54  | 3.32  | 2.24 | 1.09  | 1.85   | 2.36    |
| Co       | -0.16 | 1.27  | 3.14  | 2.08 | 0.56  | 1.62   | 2.16    |
| Ni       | 0.21  | 1.61  | 3.58  | 2.54 | 1.26  | 2.13   | 2.60    |
| Cu       | 0.13  | 1.62  | 4.24  | 2.65 | 1.47  | 2.21   | 2.79    |
| Y        | -0.81 | 2.51  | 3.90  | 1.79 | 1.43  | 1.87   | 1.82    |
| Zr       | -1.18 | 2.15  | 2.52  | 1.25 | 0.39  | 1.25   | 1.12    |
| Nb       | -0.95 | 2.33  | 1.62  | 1.17 | 0.30  | 1.08   | 0.98    |
| Mo       | -0.73 | 2.68  | 2.14  | 1.53 | 0.10  | 1.27   | 1.29    |
| Tc       | -0.86 | 0.75  | 2.15  | 1.46 | -0.67 | 1.13   | 1.34    |
| Ru       | -0.98 | 3.08  | 2.58  | 1.25 | -0.46 | 0.97   | 1.69    |
| Rh       | -0.10 | 2.37  | 3.50  | 2.01 | 0.76  | 1.78   | 2.50    |
| Pd       | 0.22  | 2.29  | 3.49  | 2.21 | 1.20  | 2.03   | 2.85    |
| Ag       | 1.06  | -0.87 | 5.24  | 3.45 | 2.82  | 3.24   | 3.74    |
| La       | -0.32 | 2.78  | 4.96  | 2.36 | 1.86  | 1.83   | 2.18    |
| Hf       | -1.42 | 2.09  | 3.55  | 1.03 | 0.08  | 1.09   | 1.00    |
| Ta       | -1.31 | 2.21  | 3.78  | 0.79 | -0.08 | 0.76   | 0.64    |
| W        | -1.16 | 2.42  | 4.16  | 3.14 | -0.58 | 0.85   | 0.72    |
| Re       | -1.22 | 1.17  | -0.25 | 1.07 | -1.83 | -0.40  | -0.53   |
| Os       | -1.09 | 0.35  | 4.22  | 2.00 | -1.12 | 0.78   | 1.33    |
| Ir       | -0.57 | 1.05  | 2.99  | 1.57 | 0.01  | 1.39   | 2.00    |
| Pt       | -0.07 | 4.99  | 2.76  | 2.08 | 0.53  | 0.01   | 2.30    |
| Au       | 0.30  | 2.62  | 4.20  | 2.58 | 2.19  | 2.18   | 3.06    |



| <b>Catalyst</b> | <b>*COCH<sub>2</sub>O</b> | <b>*COHCOH</b> | <b>*CCO</b> | <b>*COHCH<sub>2</sub>O</b> | <b>*CHCO</b> | <b>*CCOH</b> |
|-----------------|---------------------------|----------------|-------------|----------------------------|--------------|--------------|
| Sc              | 0.49                      | 1.62           | 4.56        | 0.52                       | 3.20         | 4.36         |
| Ti              | 0.66                      | 1.59           | 3.44        | 1.01                       | 2.65         | 4.53         |
| V               | 1.08                      | 1.97           | 3.96        | 1.19                       | 3.08         | 4.95         |
| Cr              | 1.38                      | 2.56           | 4.65        | 1.93                       | 3.31         | 5.30         |
| Mn              | 1.71                      | 2.88           | 5.08        | 2.12                       | 3.26         | 5.28         |
| Fe              | 1.71                      | 2.68           | 4.63        | 1.94                       | 3.32         | 5.23         |
| Co              | 1.46                      | 2.55           | 4.76        | 2.14                       | 3.38         | 5.41         |
| Ni              | 2.08                      | 3.11           | 5.71        | 2.83                       | 3.59         | 5.64         |
| Cu              | 2.72                      | 3.53           | 5.46        | 3.60                       | 3.85         | 5.73         |
| Y               | 0.76                      | 2.67           | 4.28        | 1.33                       | 2.66         | 4.44         |
| Zr              | 0.03                      | 1.02           | 3.82        | -0.19                      | 2.26         | 4.09         |
| Nb              | 0.11                      | 1.04           | 3.16        | 0.01                       | 2.61         | 4.18         |
| Mo              | 0.51                      | 1.57           | 3.76        | 0.55                       | 2.87         | 4.59         |
| Tc              | 1.62                      | 3.94           | 0.01        | 0.71                       | 2.98         | 4.65         |
| Ru              | 0.61                      | 1.97           | 4.34        | 1.31                       | 3.11         | 4.75         |
| Rh              | 1.52                      | 3.04           | 5.26        | 2.33                       | 3.62         | 5.68         |
| Pd              | 1.85                      | 3.46           | 5.76        | 2.92                       | 3.94         | 5.96         |
| Ag              | 3.76                      | 4.18           | 6.70        | 4.60                       | 4.70         | 7.01         |
| La              | 1.28                      | 3.42           | 4.87        | 1.99                       | 3.05         | 4.91         |
| Hf              | -0.35                     | 0.75           | 2.71        | 0.17                       | 1.54         | 3.70         |
| Ta              | -0.22                     | 0.45           | 2.77        | -0.57                      | 2.27         | 3.81         |
| W               | -0.21                     | 0.72           | 2.96        | -0.25                      | 2.48         | 4.05         |
| Re              | -1.45                     | -0.53          | 1.71        | -1.49                      | 1.23         | 2.81         |
| Os              | 0.04                      | 1.41           | 3.80        | 0.63                       | 2.86         | 4.23         |
| Ir              | 0.98                      | 0.01           | 4.695       | 1.73                       | 3.33         | 4.96         |
| Pt              | 1.31                      | 2.77           | 5.42        | 2.04                       | 3.72         | 4.98         |
| Au              | 2.72                      | 3.74           | 0.01        | 3.77                       | 4.34         | 6.72         |

| Catalyst | *CHOH-CH <sub>2</sub> O | *CHCOH | *CH <sub>2</sub> CO | *CHCH <sub>2</sub> O | *CH <sub>2</sub> COH | *O    |
|----------|-------------------------|--------|---------------------|----------------------|----------------------|-------|
| Sc       | 0.70                    | 3.89   | 2.82                | 3.65                 | 2.77                 | 1.87  |
| Ti       | 0.25                    | 3.11   | 2.91                | 2.98                 | 3.08                 | 1.07  |
| V        | 0.81                    | 3.56   | 3.11                | 3.30                 | 3.36                 | 1.84  |
| Cr       | 0.927                   | 4.04   | 3.34                | 3.87                 | 3.90                 | 2.87  |
| Mn       | 1.47                    | 4.09   | 3.31                | 4.77                 | 3.87                 | 3.73  |
| Fe       | 1.65                    | 3.91   | 2.95                | 4.10                 | 3.69                 | 3.57  |
| Co       | 1.47                    | 3.85   | 2.68                | 4.17                 | 3.38                 | 3.73  |
| Ni       | 2.06                    | 4.30   | 2.84                | 4.78                 | 3.91                 | 5.79  |
| Cu       | 2.55                    | 4.45   | 3.08                | 5.77                 | 4.32                 | 6.23  |
| Y        | 0.87                    | 4.15   | 2.89                | 3.93                 | 2.77                 | 2.54  |
| Zr       | -0.26                   | 2.51   | 2.54                | 2.52                 | 2.23                 | 0.58  |
| Nb       | -0.20                   | 2.71   | 2.31                | 1.98                 | 1.33                 | 0.86  |
| Mo       | 0.36                    | 3.09   | 2.50                | 2.46                 | 2.57                 | 2.06  |
| Tc       | 0.39                    | 3.69   | 2.56                | 3.09                 | 2.50                 | 2.51  |
| Ru       | 0.70                    | 3.58   | 3.12                | 3.55                 | 2.94                 | 3.40  |
| Rh       | 1.63                    | 4.41   | 3.03                | 4.25                 | 3.74                 | 4.41  |
| Pd       | 2.19                    | 4.49   | 2.94                | 4.76                 | 4.00                 | 5.24  |
| Ag       | 3.46                    | 5.04   | 3.51                | 6.96                 | 5.05                 | 6.78  |
| La       | 0.23                    | 4.59   | 2.90                | 4.41                 | 4.41                 | 2.94  |
| Hf       | -0.72                   | 2.23   | 2.43                | 2.07                 | 2.48                 | 0.18  |
| Ta       | -0.71                   | 2.14   | 2.05                | 1.41                 | 1.98                 | 0.48  |
| W        | -0.46                   | 1.39   | 2.12                | 1.46                 | 1.97                 | 1.09  |
| Re       | -1.71                   | 1.08   | 0.01                | 0.22                 | 0.72                 | -0.15 |
| Os       | -0.66                   | 3.08   | 0.01                | 2.87                 | 2.41                 | 2.81  |
| Ir       | 1.00                    | 4.02   | 2.94                | 3.55                 | 3.36                 | 3.62  |
| Pt       | 1.05                    | 3.85   | 2.43                | 3.81                 | 2.92                 | 4.22  |
| Au       | 2.63                    | 4.88   | 3.35                | 5.82                 | 4.65                 | 5.64  |

| Catalyst | *CH <sub>2</sub> CHOH | *CH <sub>2</sub> CH <sub>2</sub> O | *CH <sub>3</sub> CH <sub>2</sub> O | *CH <sub>2</sub> CH <sub>2</sub> OH | *OH  | *C <sub>2</sub> H <sub>5</sub> OH | *H <sub>2</sub> O |
|----------|-----------------------|------------------------------------|------------------------------------|-------------------------------------|------|-----------------------------------|-------------------|
| Sc       | 1.96                  | 1.88                               | -0.20                              | 1.52                                | 0.68 | 0.75                              | 1.70              |
| Ti       | 1.61                  | 1.44                               | 0.29                               | 1.61                                | 1.03 | 0.94                              | 1.83              |
| V        | 1.99                  | 1.99                               | 0.95                               | 2.04                                | 1.67 | 1.19                              | 2.08              |
| Cr       | 2.29                  | 2.27                               | 1.21                               | 3.45                                | 2.04 | 1.37                              | 2.24              |
| Mn       | 2.55                  | 2.64                               | 1.39                               | 2.46                                | 2.18 | 1.24                              | 2.06              |
| Fe       | 2.59                  | 2.92                               | 1.47                               | 2.69                                | 2.29 | 1.31                              | 2.16              |
| Co       | 2.66                  | 2.81                               | 1.79                               | 2.68                                | 2.55 | 1.26                              | 1.65              |
| Ni       | 2.95                  | 3.28                               | 2.02                               | 2.95                                | 2.75 | 3.55                              | 2.41              |
| Cu       | 3.53                  | 3.90                               | 2.25                               | 3.13                                | 3.19 | 1.77                              | 2.32              |
| Y        | 2.21                  | 2.09                               | -0.11                              | 1.48                                | 0.69 | 1.61                              | 1.71              |
| Zr       | 0.96                  | 0.88                               | -0.28                              | 1.04                                | 0.01 | 2.20                              | 1.73              |
| Nb       | 1.11                  | 1.01                               | 0.36                               | 1.45                                | 1.26 | 1.76                              | 2.13              |
| Mo       | 1.63                  | 1.57                               | 1.14                               | 1.64                                | 1.91 | 2.02                              | 2.34              |
| Tc       | 2.35                  | 1.76                               | 1.38                               | 2.05                                | 2.27 | 1.95                              | 2.44              |
| Ru       | 2.65                  | 2.01                               | 2.76                               | 1.94                                | 3.33 | 0.64                              | 2.43              |
| Rh       | 3.22                  | 3.00                               | 2.16                               | 3.76                                | 3.10 | 0.70                              | 2.66              |
| Pd       | 3.13                  | 3.35                               | 2.51                               | 2.67                                | 3.53 | 1.25                              | 2.46              |
| Ag       | 4.9                   | 4.81                               | 3.24                               | 3.84                                | 4.32 | 1.41                              | 2.18              |
| La       | 2.64                  | 2.19                               | 0.38                               | 1.96                                | 2.54 | 0.96                              | 1.93              |
| Hf       | 0.53                  | 1.32                               | -0.7                               | 0.73                                | 0.16 | 0.66                              | 1.67              |
| Ta       | 0.52                  | 0.52                               | -0.10                              | 0.97                                | 0.87 | 1.11                              | 2.04              |
| W        | 0.83                  | 0.79                               | 0.47                               | 1.28                                | 1.40 | 1.28                              | 2.22              |
| Re       | 0.92                  | -0.46                              | -0.77                              | 0.01                                | 0.15 | 2.56                              | 1.34              |
| Os       | 2.14                  | 1.48                               | 1.35                               | 1.81                                | 2.30 | 0.01                              | 1.13              |
| Ir       | 2.80                  | 2.40                               | 1.65                               | 2.24                                | 2.69 | 1.74                              | 0.01              |
| Pt       | 2.33                  | 2.60                               | 2.15                               | 1.97                                | 3.10 | 2.00                              | 0.01              |
| Au       | 3.65                  | 3.69                               | 2.84                               | 3.07                                | 4.09 | 1.99                              | 2.72              |

**Table S2.** The linear correlation  $y = a*x + b$  between adsorption free energy of intermediate species and that of  $*COCH_2O$ .  $R^2$  represents the mean square error.

| Species                             | a     | b     | R <sup>2</sup> |
|-------------------------------------|-------|-------|----------------|
| *COOH                               | 0.52  | 1.00  | 0.84           |
| *CO                                 | -0.21 | 2.25  | 0.05           |
| *CHO                                | 0.55  | 2.72  | 0.32           |
| *COH                                | 0.42  | 1.52  | 0.50           |
| *COCO                               | 0.74  | -0.18 | 0.52           |
| *COCHO                              | 0.56  | 0.97  | 0.81           |
| *COCOHO                             | 0.77  | 1.07  | 0.89           |
| *COHCOH                             | 1.00  | 1.19  | 0.87           |
| *CCO                                | 0.98  | 3.40  | 0.87           |
| *COHCH <sub>2</sub> O               | 1.23  | 0.16  | 0.92           |
| *CHCO                               | 0.63  | 2.42  | 0.86           |
| *CCOH                               | 0.79  | 4.06  | 0.92           |
| *CHOH-CH <sub>2</sub> O             | 1.03  | -0.28 | 0.92           |
| *CHCOH                              | 0.81  | 2.71  | 0.79           |
| *CH <sub>2</sub> CO                 | 0.28  | 2.49  | 0.54           |
| *CHCH <sub>2</sub> O                | 1.27  | 2.25  | 0.91           |
| *CH <sub>2</sub> COH                | 0.83  | 2.26  | 0.82           |
| *O                                  | 1.58  | 1.31  | 0.83           |
| *CH <sub>2</sub> CHOH               | 0.85  | 1.36  | 0.84           |
| *CH <sub>2</sub> CH <sub>2</sub> O  | 0.99  | 1.12  | 0.92           |
| *CH <sub>3</sub> CH <sub>2</sub> O  | 0.83  | 0.30  | 0.65           |
| *CH <sub>2</sub> CH <sub>2</sub> OH | 0.73  | 1.33  | 0.75           |
| *OH                                 | 0.84  | 1.24  | 0.67           |
| *C <sub>2</sub> H <sub>5</sub> OH   | 0.04  | 1.46  | 0.01           |
| *H <sub>2</sub> O                   | 0.20  | 1.85  | 0.35           |

**Table S3.** Comparison between limiting potential values [in Volts (V)] for Cr, Mn, Fe, Co, Cu, Tc, Rh, Pd, Re, Os and Ir based catalysts predicted using linear correlation between adsorption free energies of different intermediates vs adsorption free energy of \*COCH<sub>2</sub>O and limiting potentials computed using the free energy pathways.

| System | U <sub>L</sub> (Predicted) | U <sub>L</sub> (Calculated) |
|--------|----------------------------|-----------------------------|
| Cr     | -2.85                      | -2.23                       |
| Mn     | -2.93                      | -2.35                       |
| Fe     | -2.93                      | -2.27                       |
| Co     | -2.87                      | -2.60                       |
| Cu     | -3.17                      | -1.50                       |
| Tc     | <b>-2.91</b>               | <b>-2.70</b>                |
| Rh     | -2.88                      | -2.61                       |
| Pd     | -2.96                      | -2.51                       |
| Re     | -4.30                      | -2.39                       |
| Os     | -3.22                      | -2.46                       |
| Ir     | <b>-2.76</b>               | <b>-2.55</b>                |

\*The predicted and calculated limiting potential is given by the following equation

$$U_L = \frac{-\Delta G_{Max.}}{e}$$
